# Supplementary material for: Knockdown of SAR1B suppresses proliferation and induces apoptosis of RKO colorectal cancer cells
Source: PubMed Central journal article supplement — Oncol Lett. 2020 Sep 3;20(5):186. doi: 10.3892/ol.2020.12048 (PMC7479511; doi:10.3892/ol.2020.12048), 2020-09-03

Figure S1. DepMap portal dataset analysis showed the dependency of SAR1B for cancer cell survival. Results of genome-wide short hairpin RNA (or small interfering RNA) inhibition for SAR1B using RNAi data from the Broad (17) and Novartis (18) datasets showed the dependency of SAR1B for cancer cell survival. Black nodes represent the cell lines with hot spot mutations. SAR1B, SAR1 gene homolog B; RNAi, RNA interference.

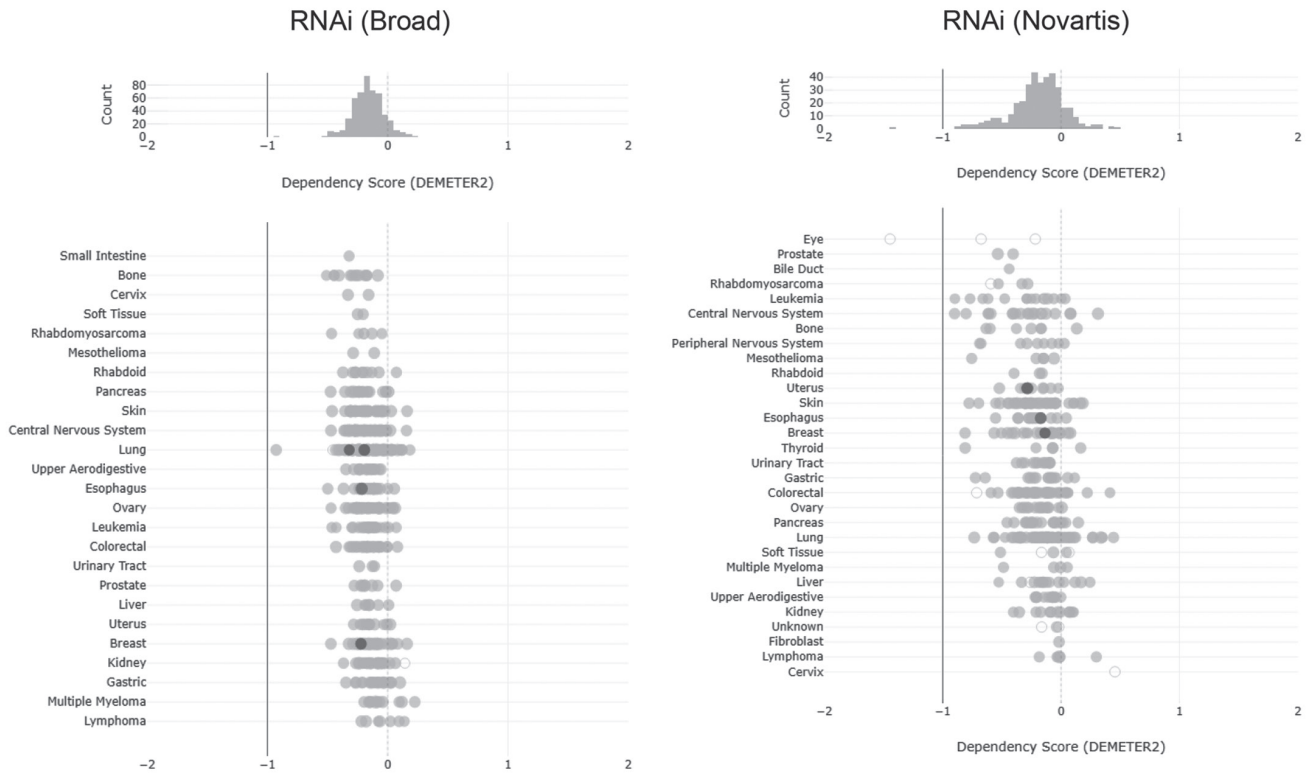

Supplement: Supplementary_Data1.pdf [file Supplementary_Data1.pdf]
